# Supplementary material
Source: Springer Nature journal article supplement (https://www.springermedizin.de/resource/supplementary/12883_2012_740_MOESM4_ESM.pdf/9455682)

a

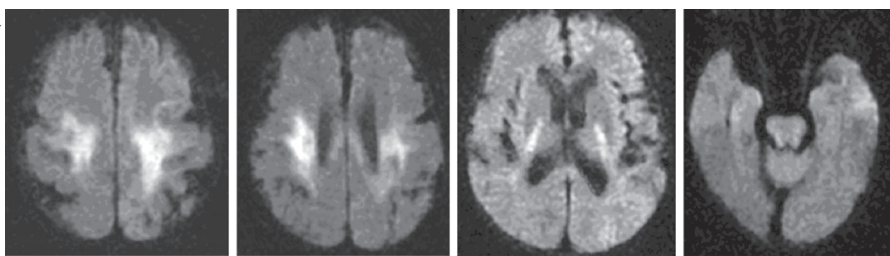

b

2 hours after onset, NIHSS = 3

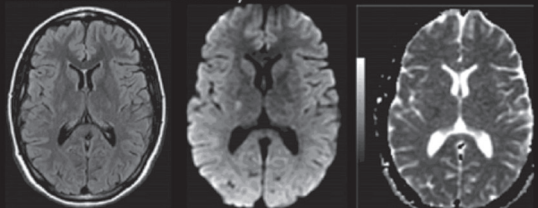

c

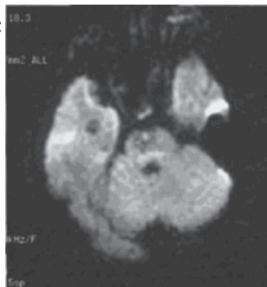

4 hours after onset, NIHSS = 7

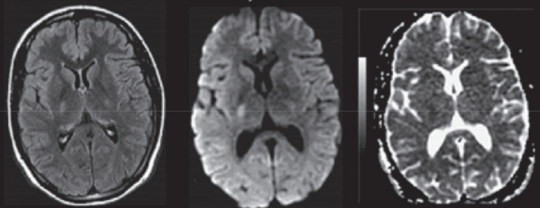

12 hours after onset, NIHSS = 0

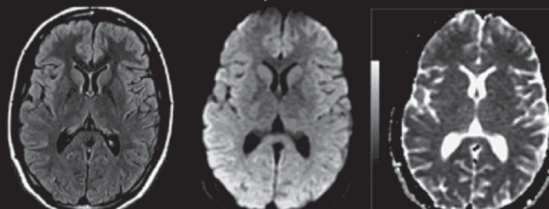

FLAIR

DWI

ADC

Supplement: MOESM4 [file 9455682]
